# Supplementary figures and images for: Effect of injectable calcium alginate–amelogenin hydrogel on macrophage polarization and promotion of jawbone osteogenesis
Source: Royal Society of Chemistry journal article supplement (doi:10.1039/d3ra05046g), 2024-01-01

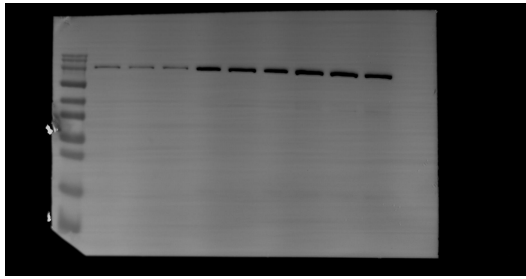

COL1

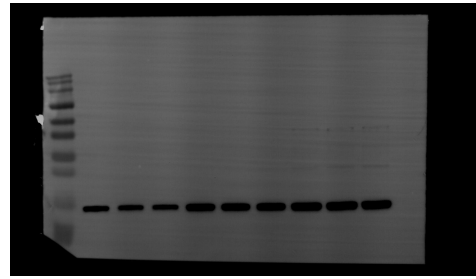

OCN

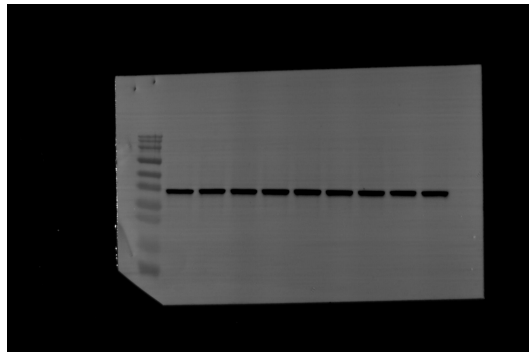

GAPDH

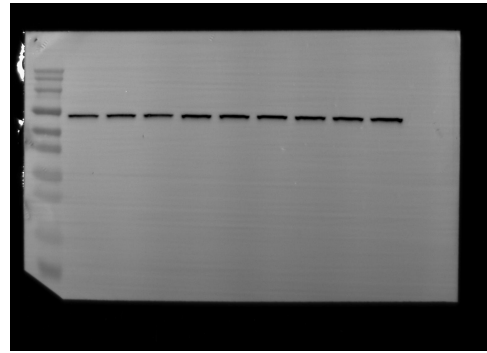

RUNX2

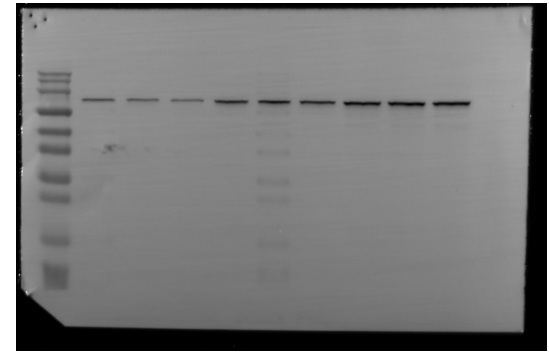

ALP

Supplement: d3ra05046g1.pdf [file d3ra05046g1.pdf]
